# Supplementary figures and images for: ER-luminal [Ca2+] regulation of InsP3 receptor gating mediated by an ER-luminal peripheral Ca2+-binding protein
Source: eLife journal article supplement (doi:10.7554/elife.53531), 2020-05-18

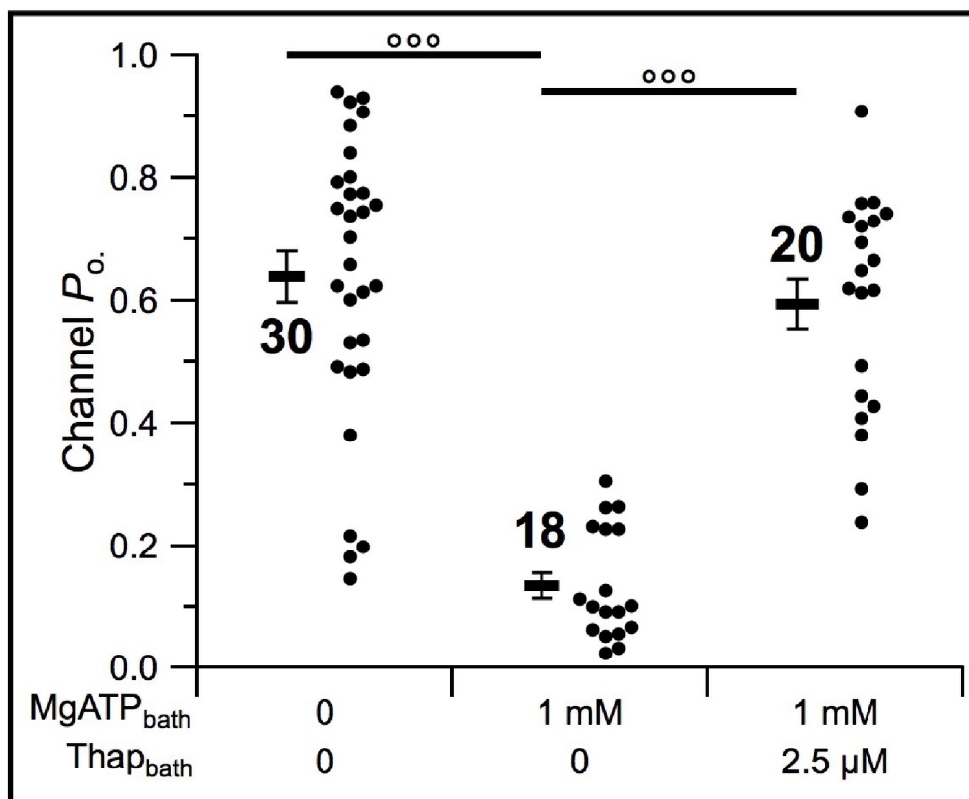

Figure 3-figure supplement 1

Supplement: supp [file elife-53531-supp-v1.zip]

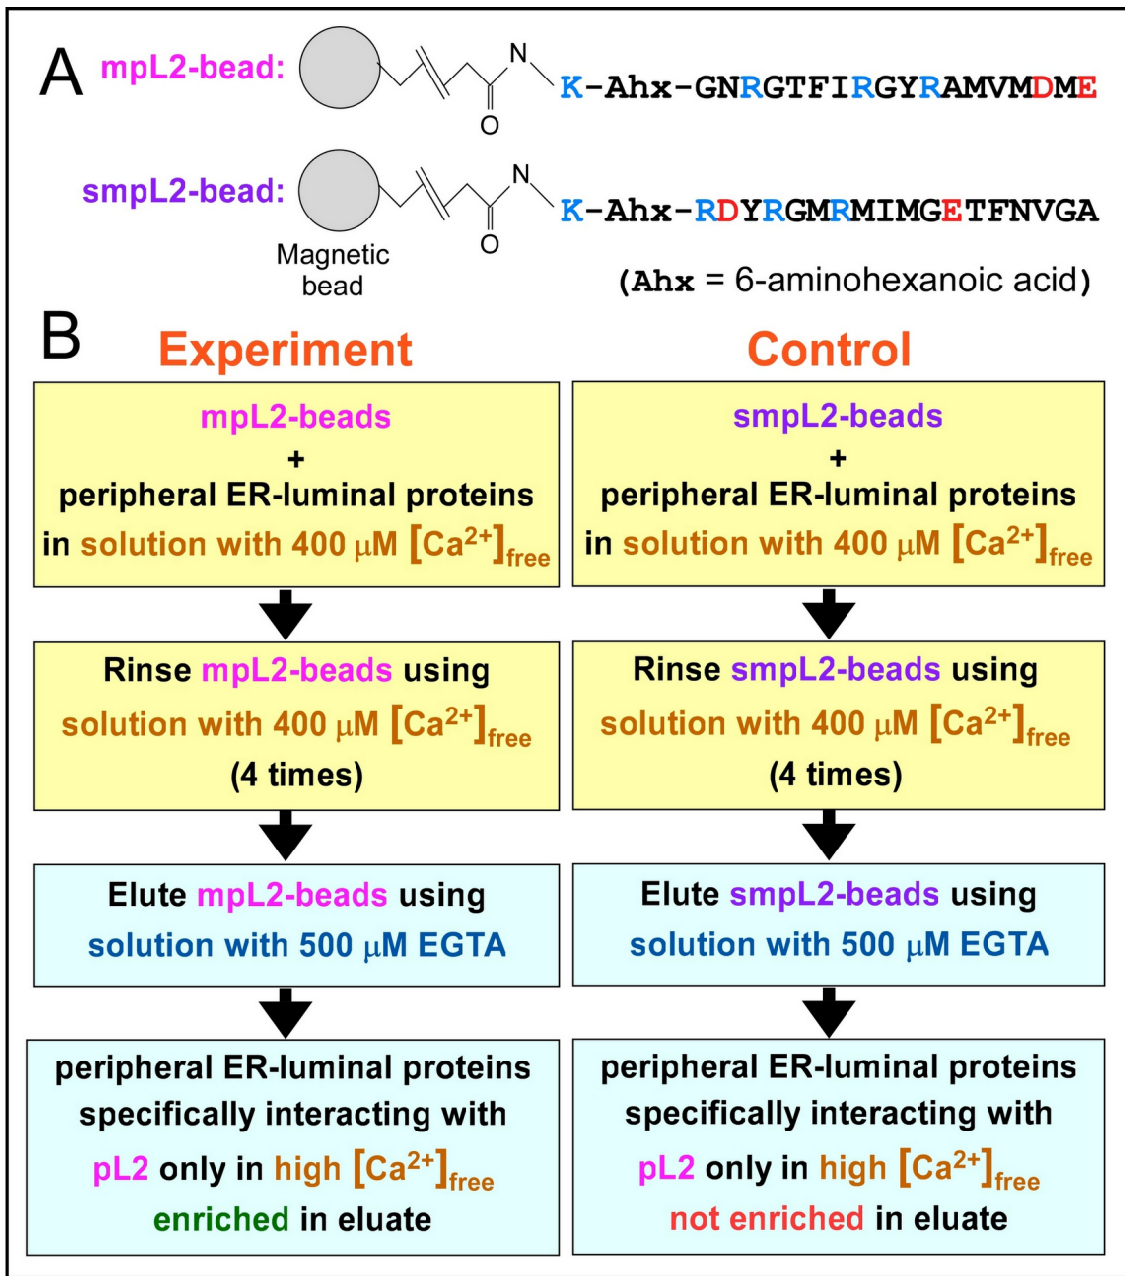

Figure 6-figure supplement 1

Supplement: supp [file elife-53531-supp-v1.zip]

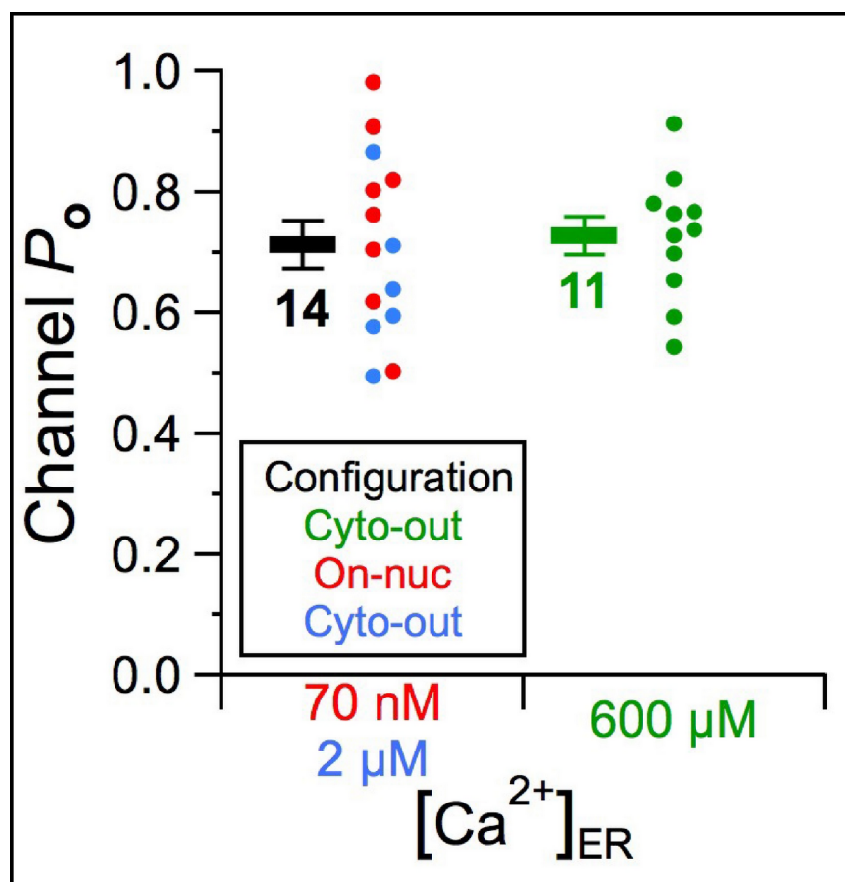

Figure 7-figure supplement 1

Supplement: supp [file elife-53531-supp-v1.zip]
